# Supplementary material
Source: PubMed Central journal article supplement (PMC3702745)

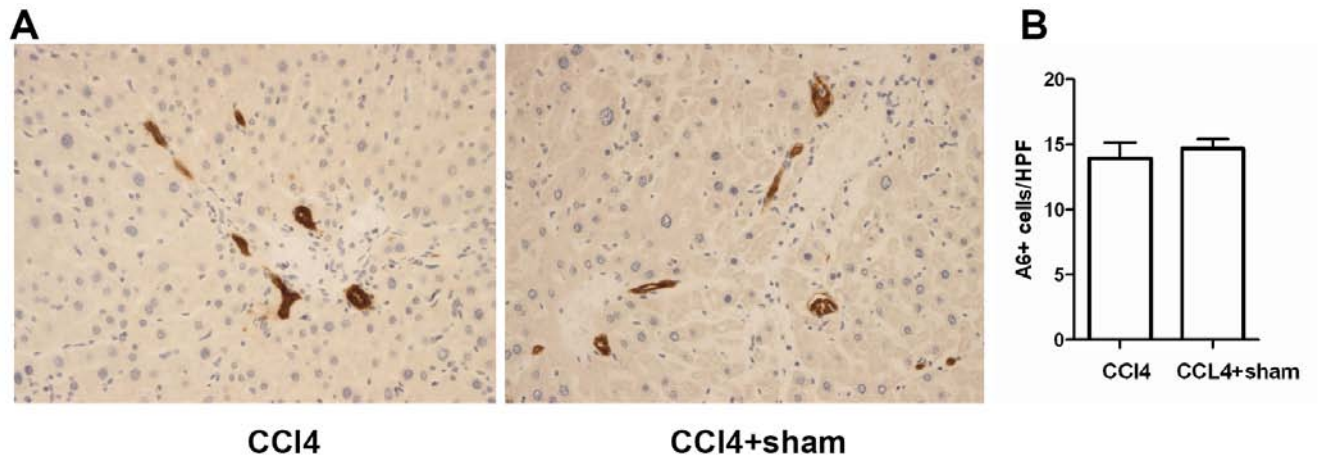

Supplemental Figure 1

Supplement: mmc1.pdf [file mmc1.pdf]
